51. Turken A, Whitfield-Gabrieli S, Bammer R, Baldo JV, Dronkers NF, Gabrieli JD: Cognitive processing speed and the structure of white matter pathways: Convergent evidence from normal variation and lesion studies. *Neuroimage* 2008; 42:1032-44
52. Dawson JD, Uc EY, Anderson SW, Johnson AM, Rizzo M: Neuropsychological predictors of driving errors in older adults. *J Am Geriatr Soc* 2010; 58:1090-6
53. Pandharipande PP, Pun BT, Herr DL, Maze M, Girard TD, Miller RR, Shintani AK, Thompson JL, Jackson JC, Deppen SA, Stiles RA, Dittus RS, Bernard GR, Ely EW: Effect of sedation with dexmedetomidine vs lorazepam on acute brain dysfunction in mechanically ventilated patients: The MENDS randomized controlled trial. *JAMA* 2007; 298:2644-53

## ANESTHESIOLOGY REFLECTIONS FROM THE WOOD LIBRARY-MUSEUM

### Tintype and Chloroform Inhaler of Confederate Surgeon J. J. Chisolm, *Not Chisholm*

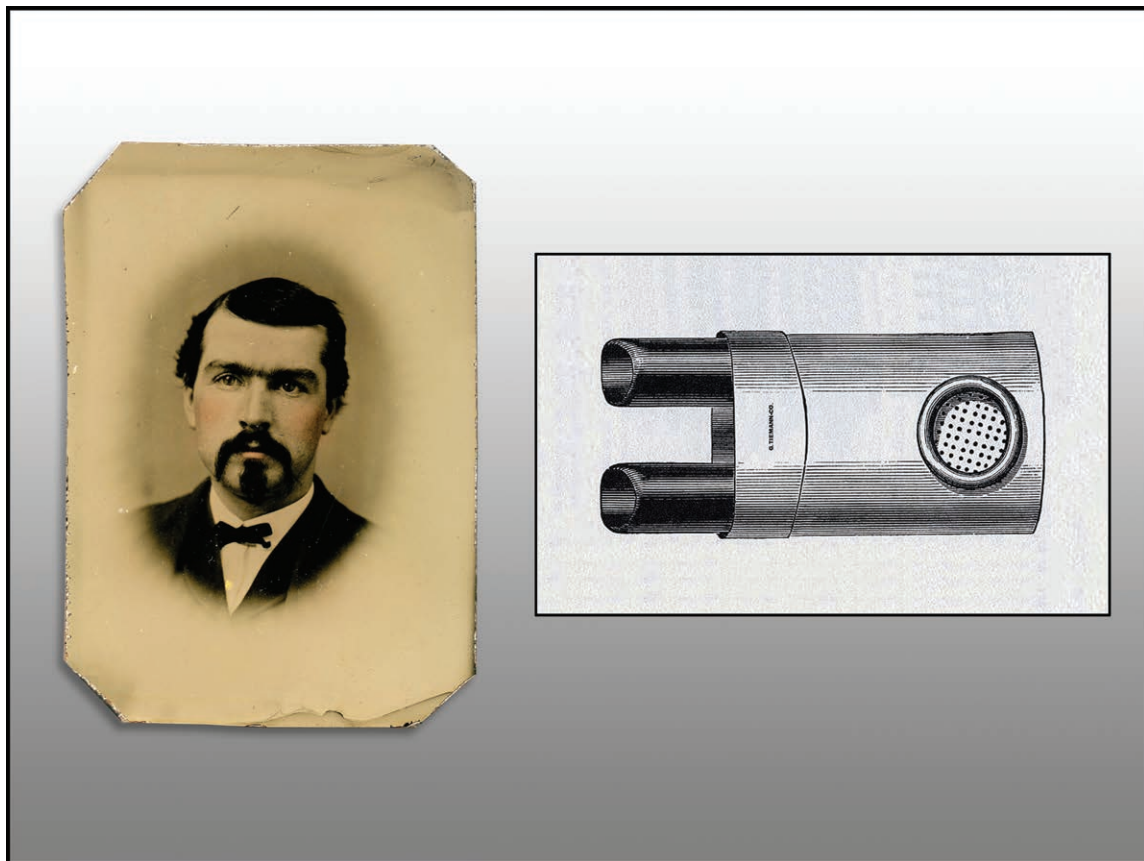

One of the most misspelled names in medical history is that of John Julian Chisolm, M.D. (1830 to 1903). He was not Julian John Chisholm.... Fortunately, this image (*left*), reconstructed from a tintype in the collection of the Wood Library-Museum, has captured his visage more accurately than medical literature has recorded Chisolm's name. An 1850 graduate of the Medical College of the State of South Carolina (MCSSC), Chisolm treated Civil War wounded from the Battle of Fort Sumter and then served as a Confederate Surgeon in both Virginia and South Carolina. From 1867 through 1872, Dr. Chisolm served as dean at the MCSSC and then the University of Maryland School of Medicine. As illustrated not in Chisolm's masterwork, *A Manual of Military Surgery, for the Use of Surgeons in the Confederate Army*, but in a Tiemann catalog, his namesake Chisolm inhaler (*right*) spared use of chloroform, with which the Confederacy was undersupplied. (Copyright © the American Society of Anesthesiologists' Wood Library-Museum of Anesthesiology.)

*George S. Bause, M.D., M.P.H., Honorary Curator and Laureate of the History of Anesthesia, Wood Library-Museum of Anesthesiology, Schaumburg, Illinois, and Clinical Associate Professor, Case Western Reserve University, Cleveland, Ohio. UJYC@aol.com.*
